# Supplementary material
Source: PubMed Central journal article supplement (PMC5481653)
Supplement: BPH-174-2409-s001.pdf [file BPH-174-2409-s001.pdf]

# Jockers\_Figure S1

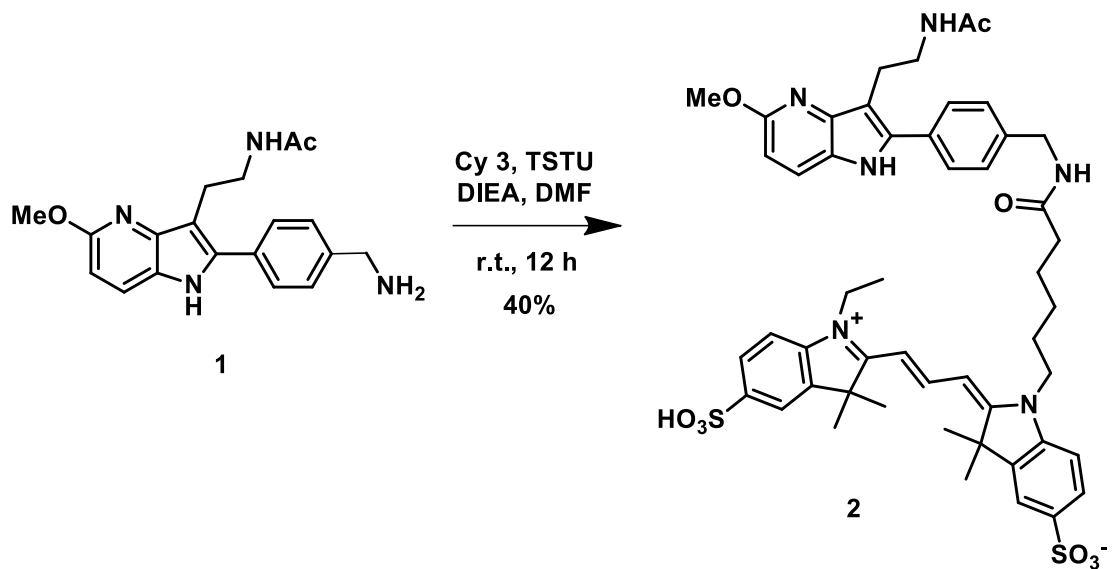

Figure S1: Synthesis of probe 2 “C2 tagging”.

## Jockers\_Figure S2

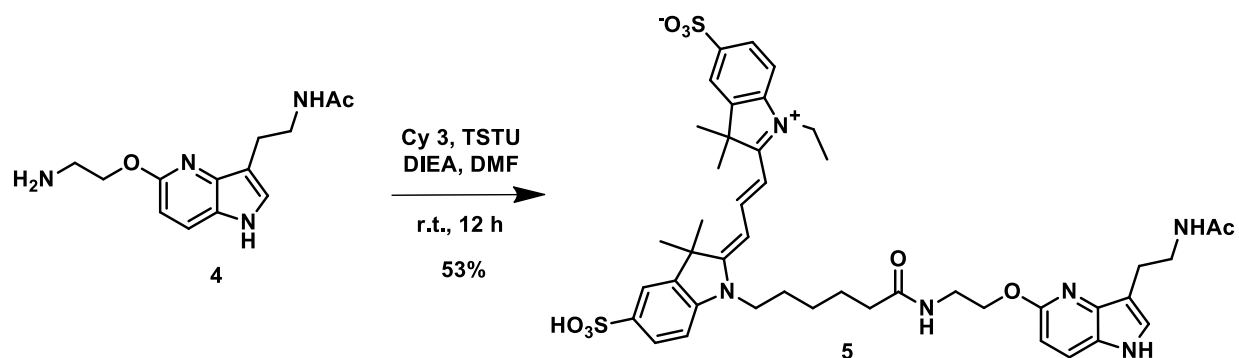

**Figure S2:** Synthesis of probes 5 “C5 tagging”.

## Jockers\_Figure S3

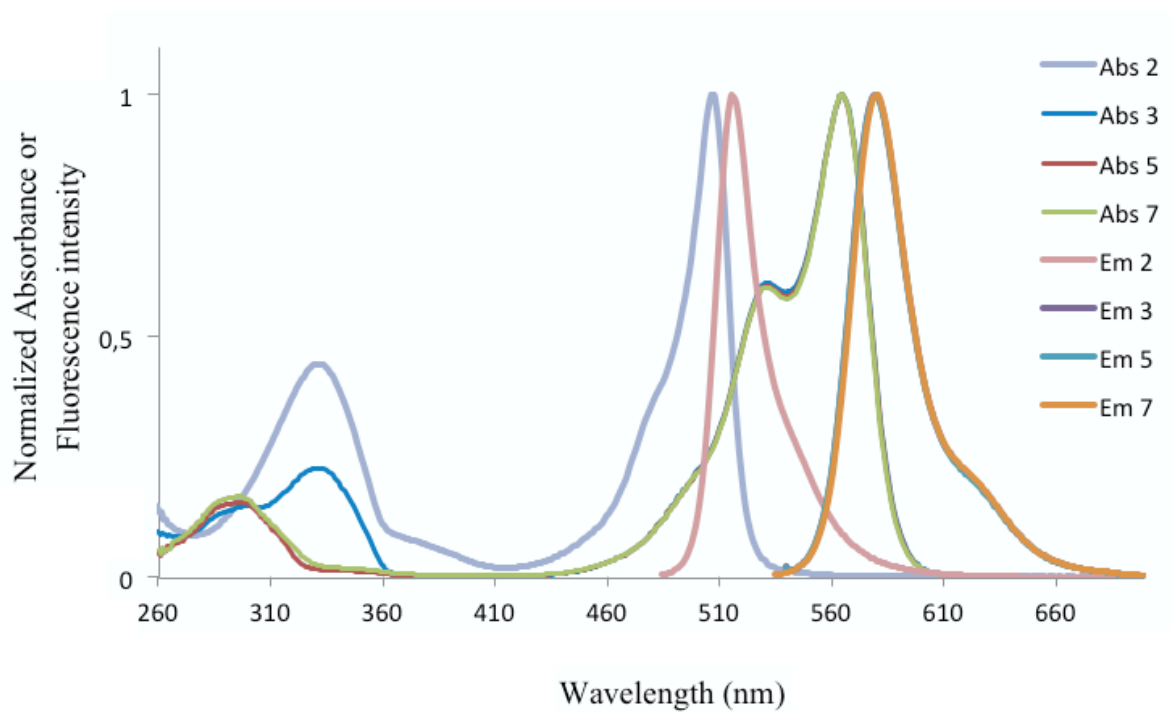

**Figure S3:** Absorption (Abs) and emission (Em) spectra of compounds **2**, **3**, **5** and **7** recorded in DMSO at 25 °C.

## Jockers\_Figure S4

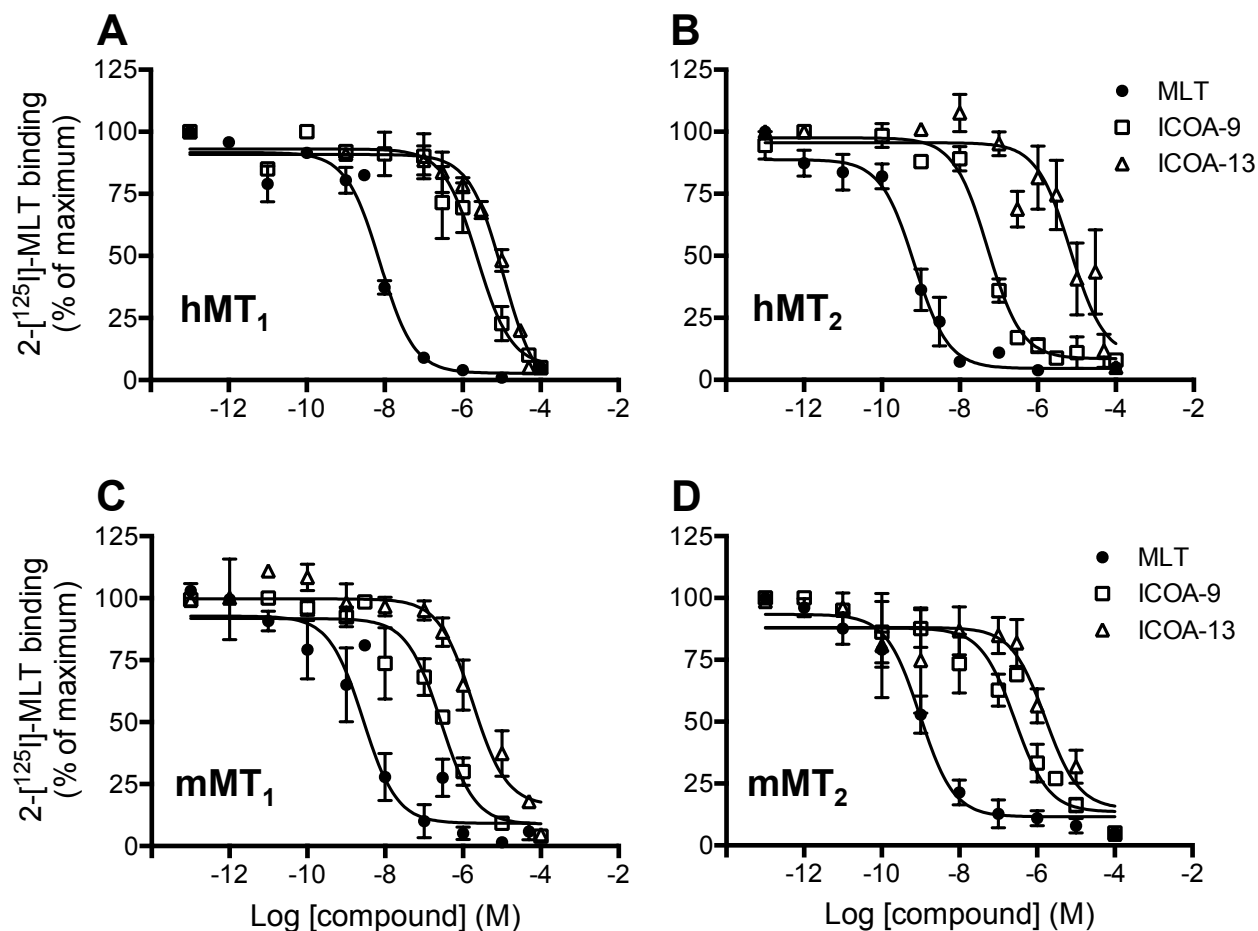

**Figure S4: Competition of 2-[<sup>125</sup>I]-MLT binding by melatonin (MLT), ICOA-9 and ICOA-13.** Crude membranes of HEK293 cells expressing hMT<sub>1</sub> (A), hMT<sub>2</sub> (B), mMT<sub>1</sub> (C) or mMT<sub>2</sub> (D) receptors were incubated with 0.1nM 2-[<sup>125</sup>I]-MLT and increasing concentrations of the indicated compounds. Data are expressed as mean ± S.E.M. from 3-8 independent experiments (A. melatonin n=4, ICOA-9 n=4, ICOA-13 n=3; B. all groups n=4; C. melatonin n=8, ICOA-9 n=7, ICOA-13 n=6; D. melatonin n=8, ICOA-9 and ICOA-13 n=7). Data are represented as percentage of maximal binding in the absence of compounds and normalized to melatonin maximum effect.

## Jockers\_Figure S5

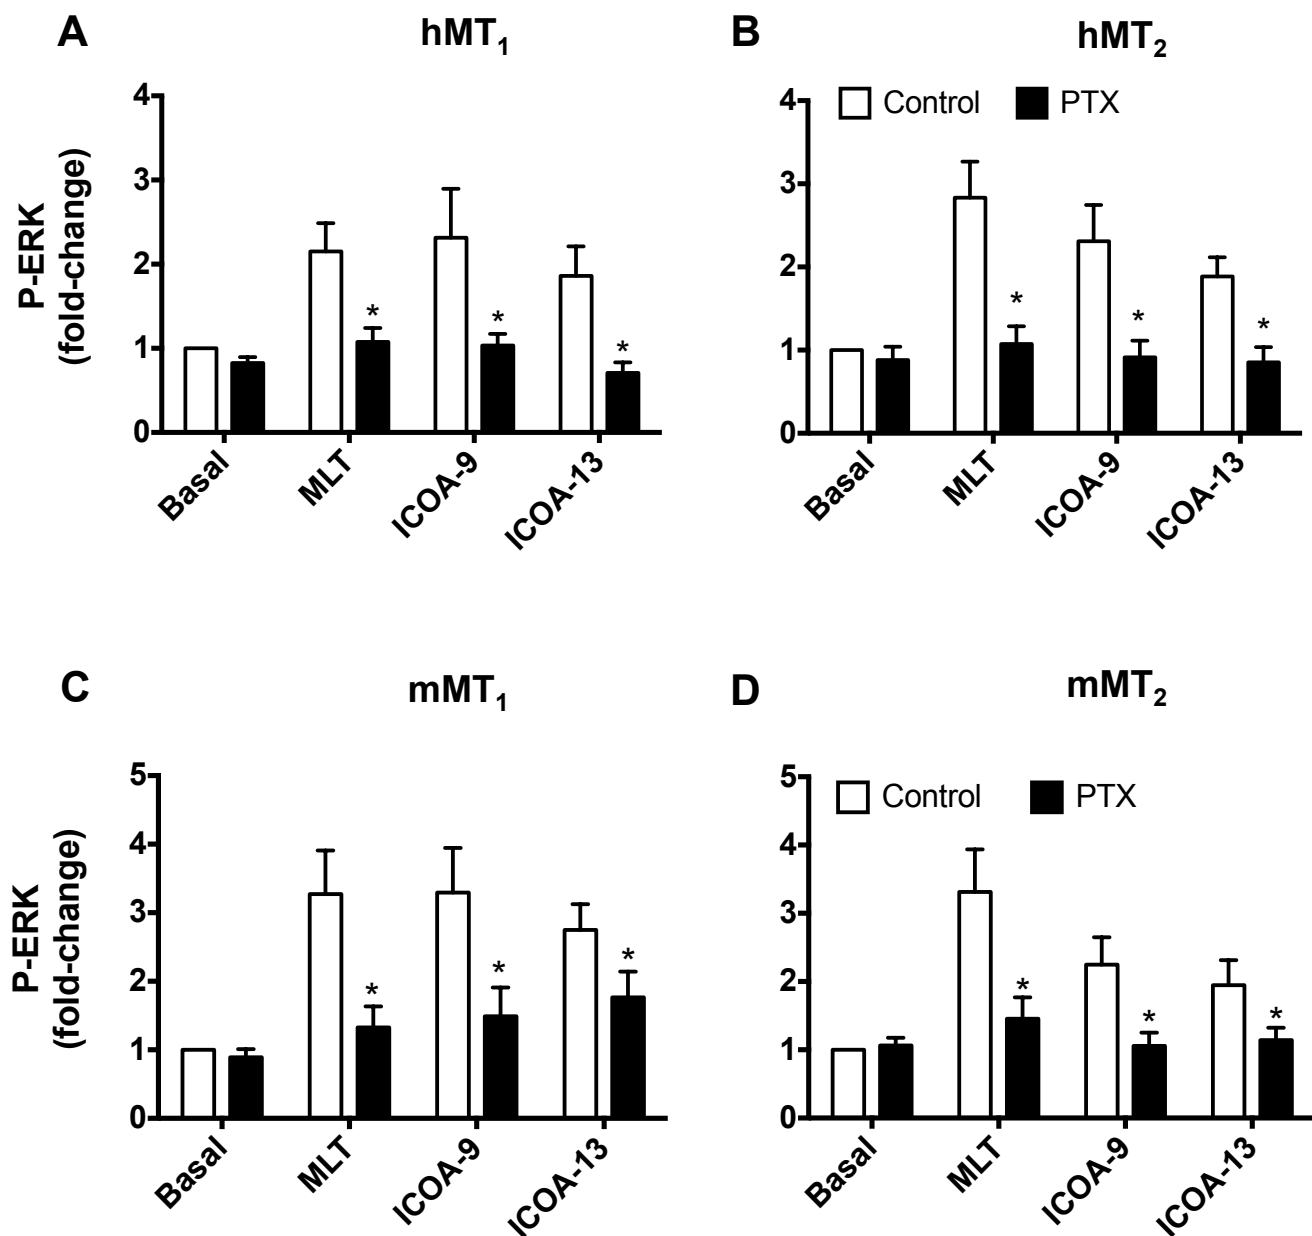

**Figure S5: ERK1/2 activation in the absence or presence of PTX.** Detection of phospho-ERK1/2 in HEK293 cells expressing hMT<sub>1</sub> (A), hMT<sub>2</sub> (B), mMT<sub>1</sub> (C) or mMT<sub>2</sub> (D) receptors incubated for 5 min with MLT (100 nM), ICOA-9 (1  $\mu$ M), ICOA-13 (1  $\mu$ M) in the absence or presence of PTX (10 ng/ $\mu$ l, overnight). Data are expressed as mean  $\pm$  S.E.M. from 5 independent experiments. \* $p$  < 0.05 compared to respective control by Student t test, one-tail analysis.

## Jockers\_Figure S6

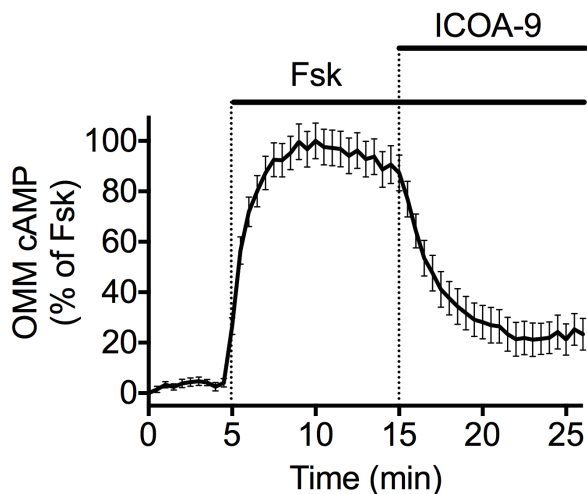

**Figure S6:** Effect of ICOA-9 on cAMP production in neuroblastoma cells. Averaged time courses of Fsk-mediated (10 $\mu$ M) cAMP production in N2a cells expressing MT<sub>1</sub> and the FRET-based cAMP biosensors localized at the outer mitochondrial membrane (OMM) and challenged by ICOA-9 (1  $\mu$ M). Data expressed as the mean value  $\pm$  s.d. from n = 48.

# Jockers\_Figure S7

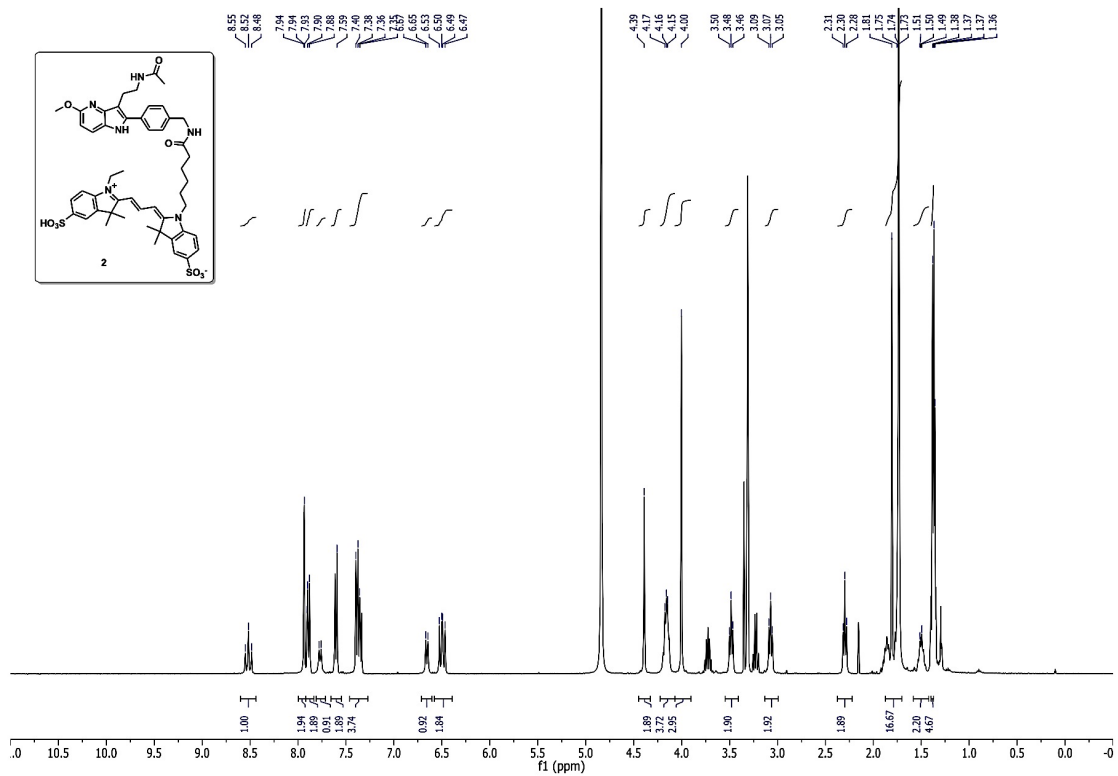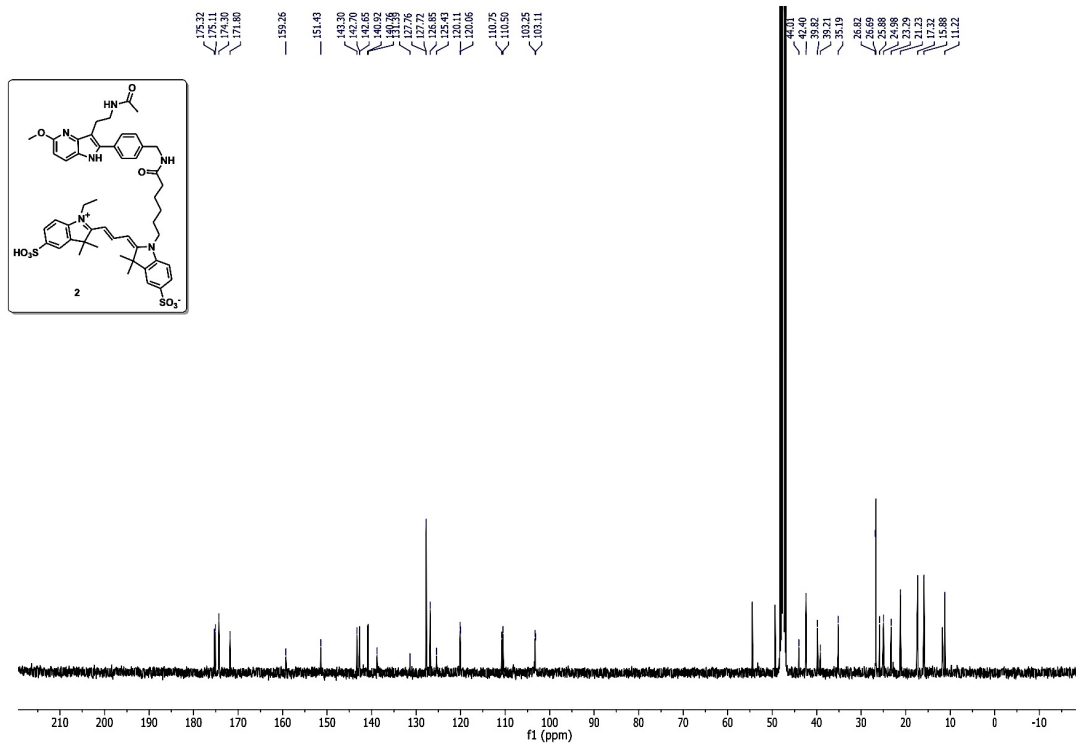

Figure S7: <sup>1</sup>H and <sup>13</sup>C NMR spectra of compound 2.

# Jockers\_Figure S8

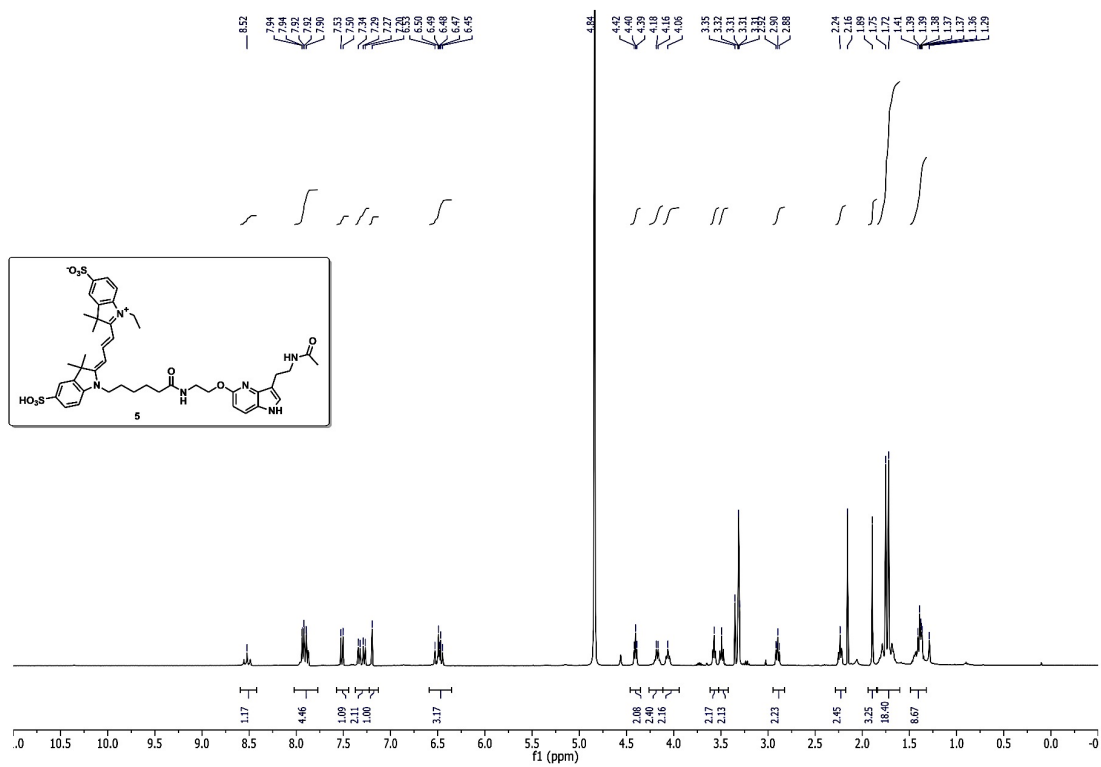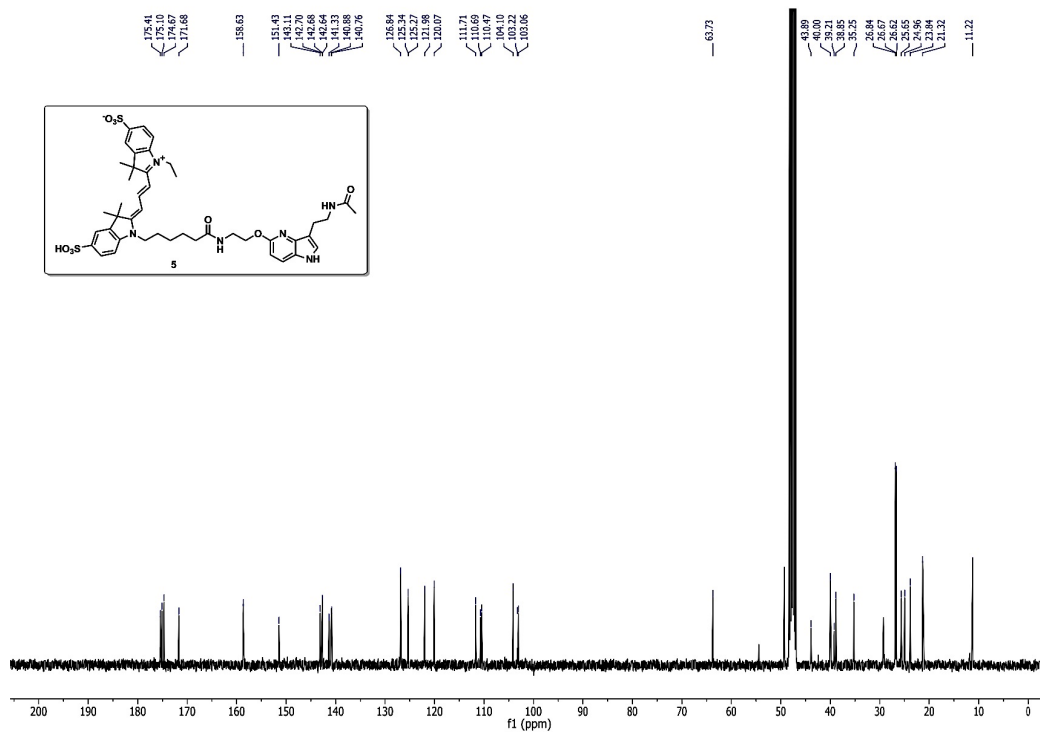

**Figure S8:** <sup>1</sup>H and <sup>13</sup>C NMR spectra of compound 5.



# Jockers\_Figure S9

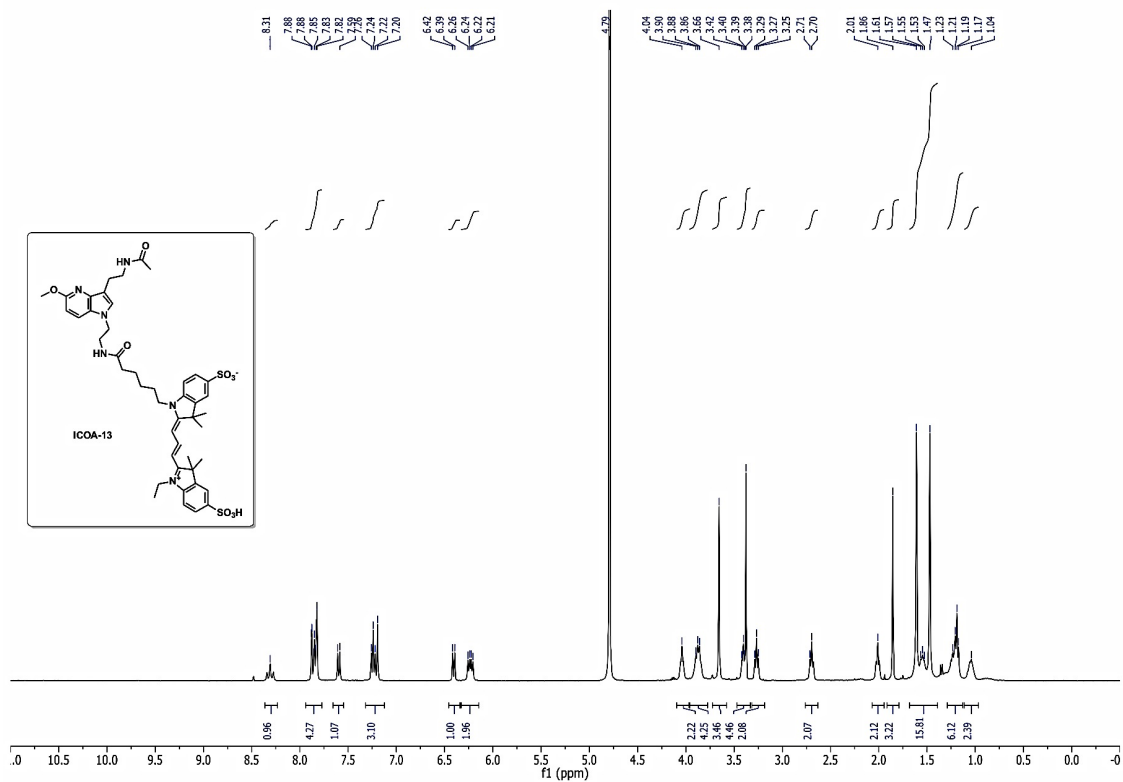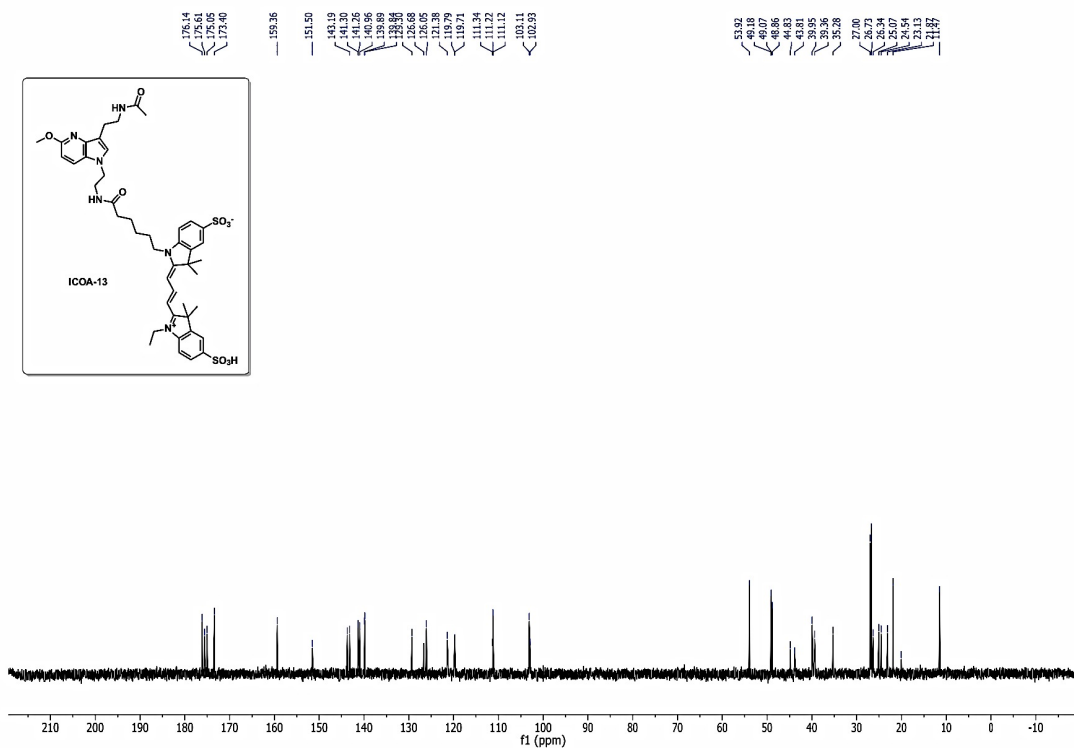

Figure S9: <sup>1</sup>H and <sup>13</sup>C NMR spectra of compound 7 (ICOA-13).

## Jockers\_Table S1

**Table S1:** Photophysical and physicochemical properties of compounds **2**, **3**, **5** and **7**.

| <b>Compound</b> | $\lambda_{\text{max}}$<br>(nm) | $\lambda_{\text{em}}$<br>(nm) | $\epsilon_{(\lambda_{\text{max}})}$<br>(L.mol-<br>l.cm-1) | $\Phi^*$ | $\epsilon \Phi^{\#}$ |
|-----------------|--------------------------------|-------------------------------|-----------------------------------------------------------|----------|----------------------|
| <b>2</b>        | 565                            | 580                           | 126126                                                    | 0.15     | 18919                |
| <b>3</b>        | 508                            | 516                           | 89177                                                     | 0.46     | 41021                |
| <b>5</b>        | 565                            | 580                           | 99234                                                     | 0.16     | 15877                |
| <b>7</b>        | 565                            | 580                           | 63125                                                     | 0.17     | 10731                |

\* Quantum yield; # Brightness

## Jockers\_Table S2

**Table S2:**  $\Delta\Delta\log(\tau/K_A)$  ratios and bias factors for ICOA-9 and ICOA-13 at the hMT<sub>1</sub>, hMT<sub>2</sub>, mMT<sub>1</sub> and mMT<sub>2</sub>

| Receptor         | Ligand    | cAMP- $\beta$ arr  |        | cAMP-ERK           |        | $\beta$ arr-ERK    |      |
|------------------|-----------|--------------------|--------|--------------------|--------|--------------------|------|
|                  |           | $\Delta\Delta\log$ | BF     | $\Delta\Delta\log$ | BF     | $\Delta\Delta\log$ | BF   |
| hMT <sub>1</sub> | Melatonin | 0                  | 1.00   | 0                  | 1.00   | 0                  | 1.00 |
|                  | ICOA-9    | 1.40 ± 0.44        | 25.64* | 1.76 ± 0.47        | 57.54* | 0.35 ± 0.29        | 2.24 |
|                  | ICOA-13   | -0.06 ± 0.57       | 0.86   | -0.15 ± 0.52       | 0.70   | -0.09 ± 0.40       | 0.81 |
| hMT <sub>2</sub> | Melatonin | n.d.               |        | n.d.               |        | 0                  | 1.00 |
|                  | ICOA-9    | n.d.               |        | n.d.               |        | 0.24 ± 0.47        | 1.72 |
|                  | ICOA-13   | n.d.               |        | n.d.               |        | 0.81 ± 0.60        | 6.47 |
| mMT <sub>1</sub> | Melatonin | N/A                |        | 0                  | 1.00   | N/A                |      |
|                  | ICOA-9    | N/A                |        | 1.47 ± 0.68        | 29.24  | N/A                |      |
|                  | ICOA-13   | N/A                |        | 1.03 ± 0.69        | 10.81  | N/A                |      |
| mMT <sub>2</sub> | Melatonin | N/A                |        | 0                  | 1.00   | N/A                |      |
|                  | ICOA-9    | N/A                |        | 0.43 ± 0.64        | 2.70   | N/A                |      |
|                  | ICOA-13   | N/A                |        | 0.07 ± 0.68        | 1.18   | N/A                |      |

$\Delta\log(\tau/K_A)$  ratios were used to calculate  $\Delta\Delta\log(\tau/K_A)$  ratios and expressed as mean  $\Delta\Delta\log(\tau/K_A) \pm$  S.E.M of three to six independent experiments with repeats in duplicate or triplicate. Ligand bias factors (BF), relative to melatonin, were determined and data were analyzed in a pairwise manner using a two-tailed unpaired Student's *t* test [on the  $\Delta\log(\tau/K_A)$  ratios] to determine the significance of the ligand biases.  $\beta$ arr:  $\beta$ -arrestin2; n.d.: could not be determined as EC<sub>50</sub> and E<sub>max</sub> values could not be determined for the cAMP assay; N/A: Not Applicable; \**P* < 0.05.
